# Supplementary material for: Ruthenium complex dye with designed ligand capable of chelating triiodide anion for dye-sensitized solar cells
Source: Royal Society of Chemistry journal article supplement (doi:10.1039/c3ta01567j), 2013-01-01
Supplement: c3ta01567j.pdf [file c3ta01567j.pdf]

## Supporting information for :

### Ruthenium Complex Dye with Designed Ligand Capable of Chelating Triiodide Anion for Dye-Sensitized Solar Cells

Jen-Shyang Ni,<sup>a</sup> Kuo-Chuan Ho<sup>a</sup> and King-Fu Lin<sup>\*a,b</sup>

<sup>a</sup> Institute of Polymer Science and Engineering, National Taiwan University, Taipei,  
Taiwan.

<sup>b</sup> Department of Materials Science and Engineering, National Taiwan University,  
Taipei, Taiwan.

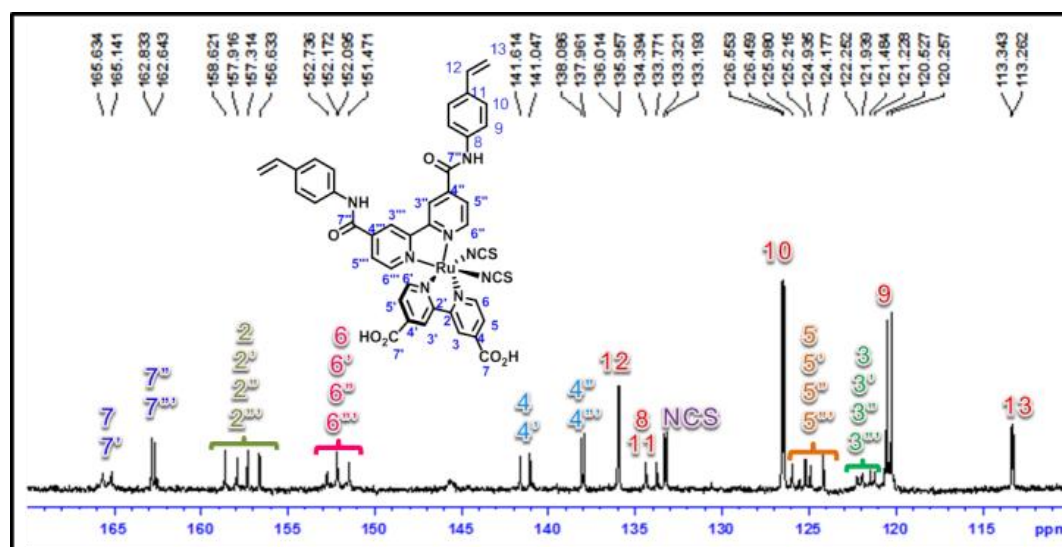

Fig. S1 <sup>13</sup>C NMR spectrum of RuAS.

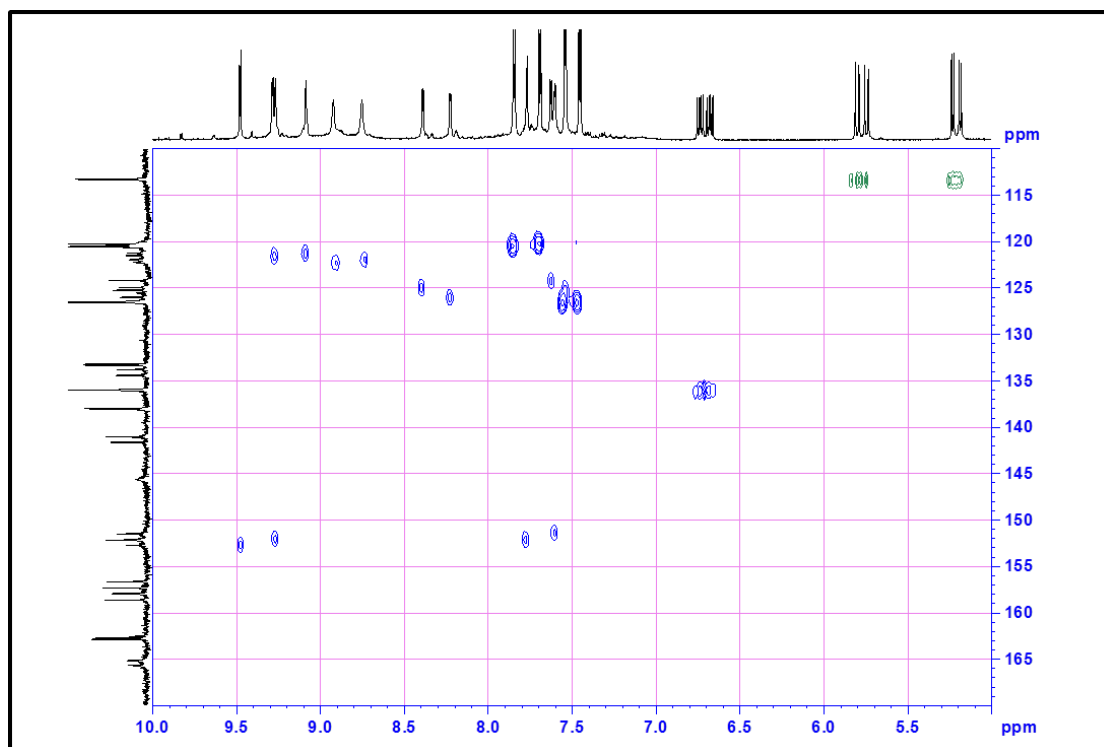

**Fig. S2** HSQC spectrum of **RuAS**.

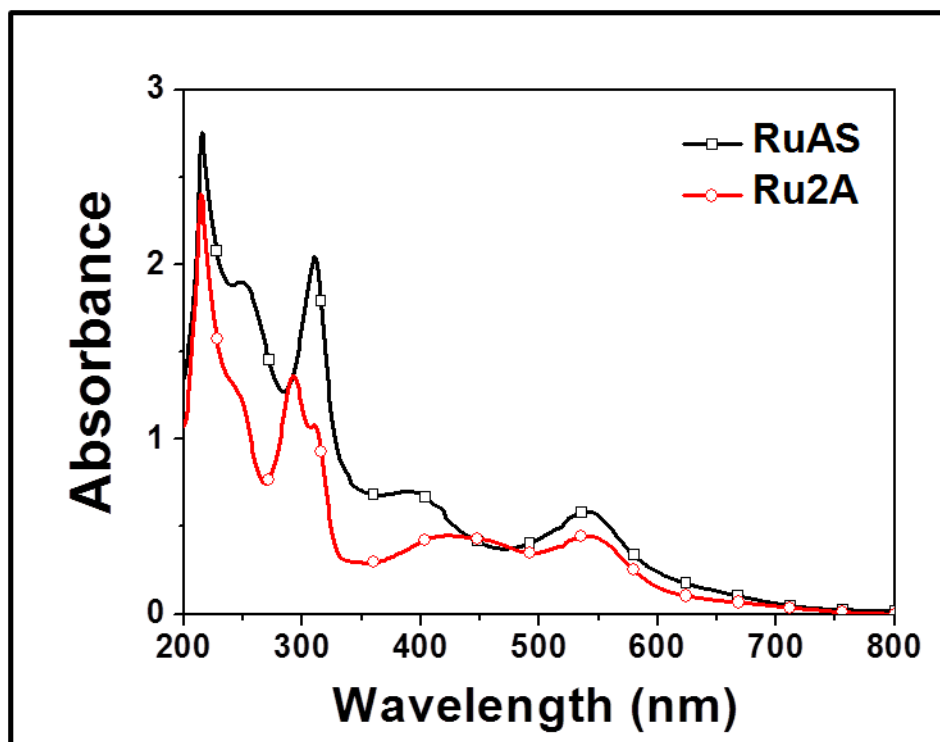

**Fig. S3** UV-vis absorption spectra of **RuAS** and **Ru2A** in ACN/*t*-butanol (1:1 by volume) at a concentration of 50  $\mu$ M.

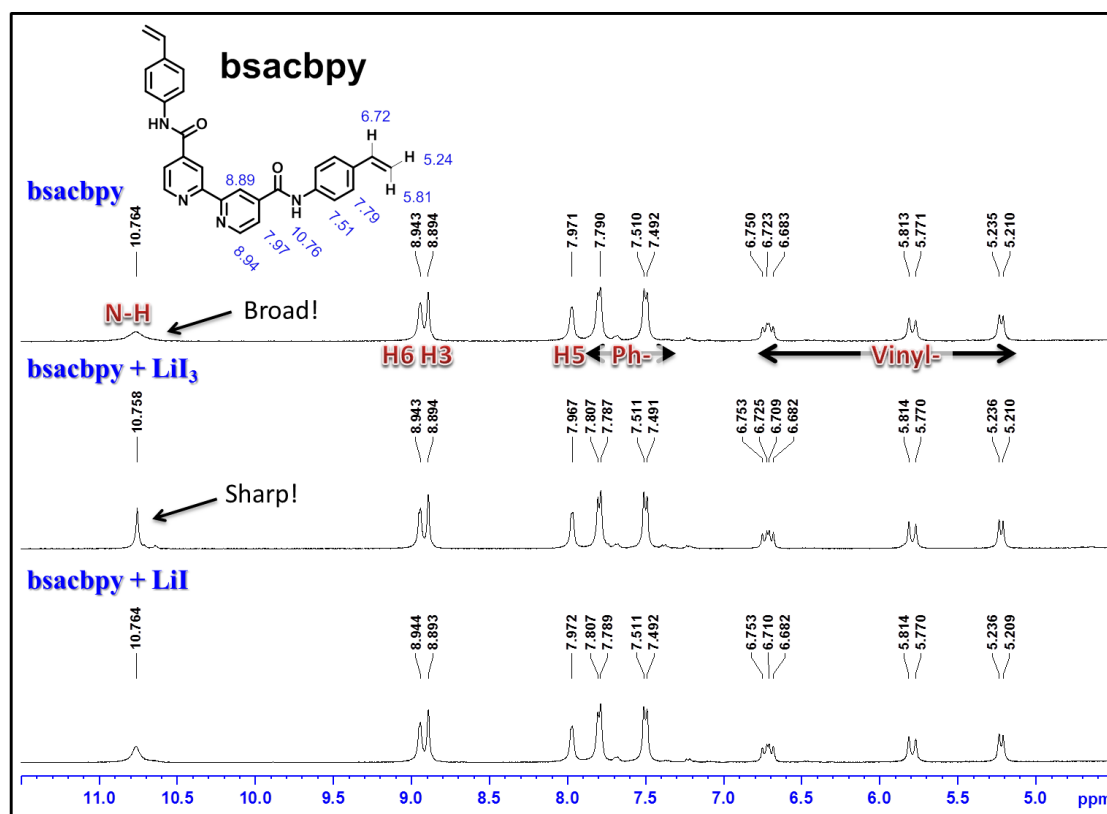

**Fig. S4** <sup>1</sup>H NMR spectra of bsacbpy and its mixtures with equivalent concentration (0.01M) of LiI<sub>3</sub> and LiI, respectively. Note: The proton peak at 10.7 ppm contributed by the amide groups of bsacbpy became sharper after chelating I<sub>3</sub><sup>-</sup>, similar to the dimer of RuAS shown in Fig. 2.

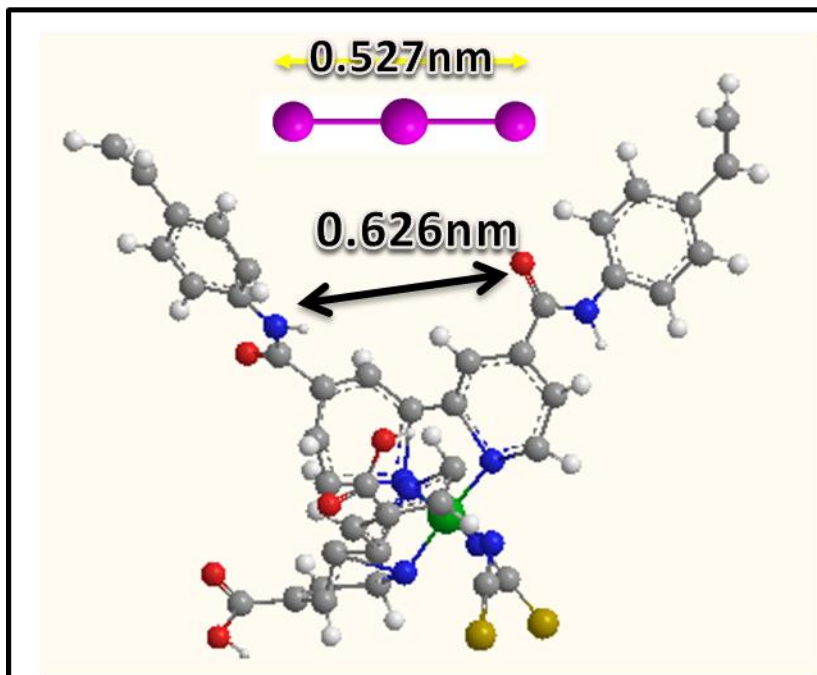

**Fig. S5** Three dimensional configurations of **RuAS** and  $I_3^-$  molecules drawn by ChemBio3D. (The blue, green, grey, purple, red and white color is nitrogen, ruthenium, carbon, iodide, oxygen and hydrogen.)

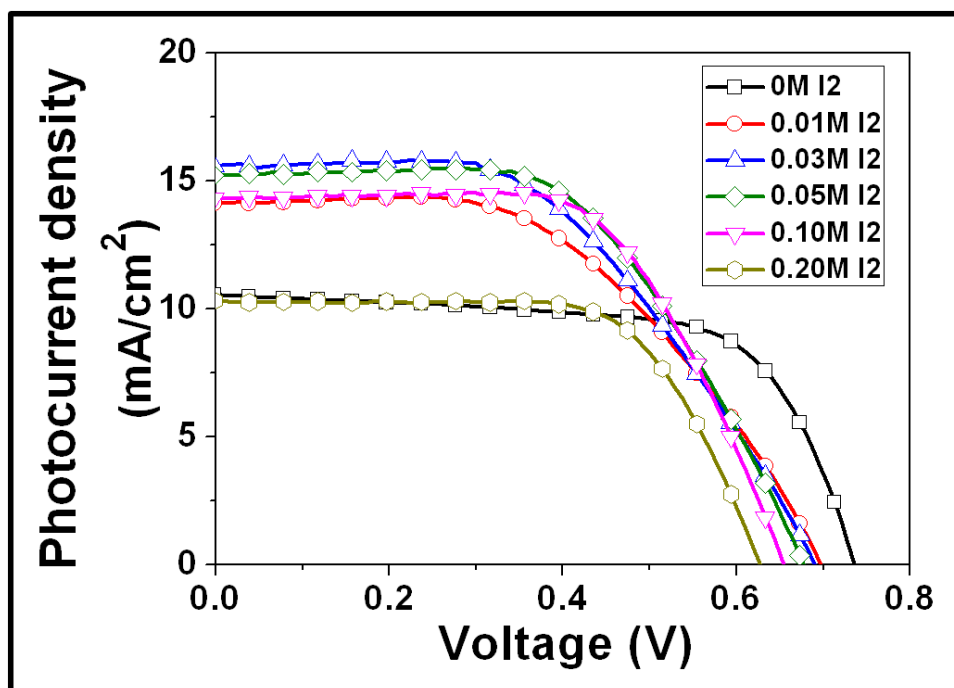

**Fig. S6** Photocurrent-voltage plots of DSSC based on **Ru2A** with various I<sub>2</sub> concentrations of liquid electrolyte under AM 1.5 full sunlight.

(a)

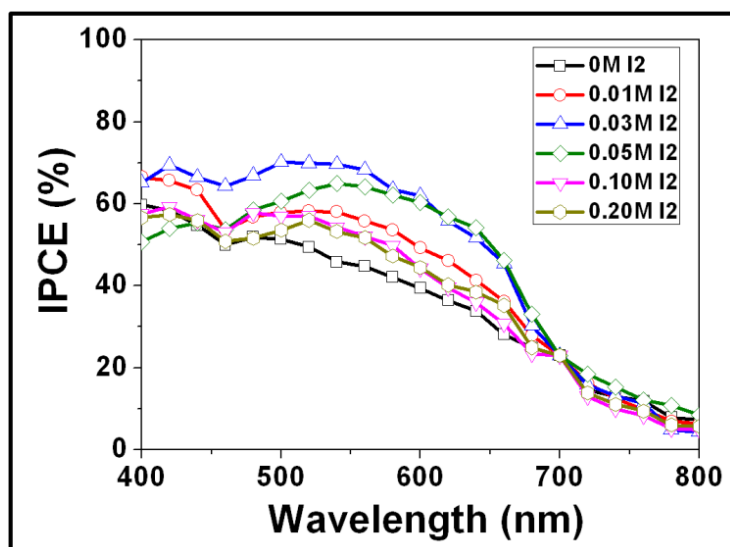

(b)

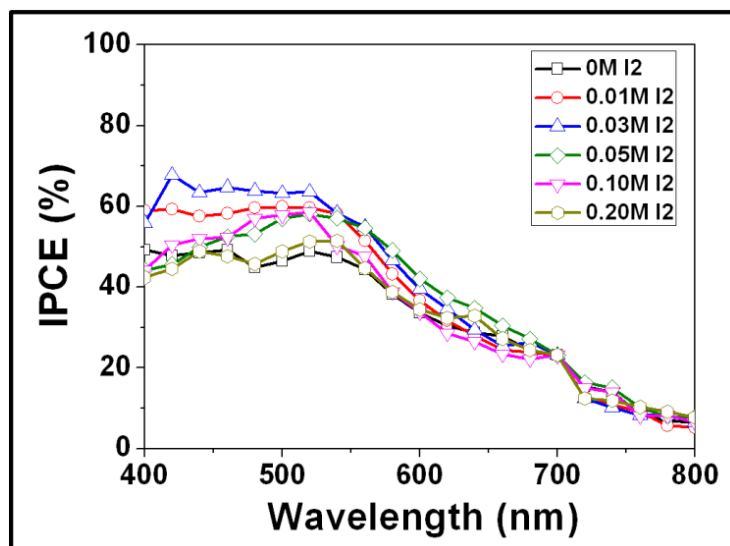

**Fig. S7** IPCE spectra of the DSSCs with (a) RuAS and (b) Ru2A containing various I<sub>2</sub> concentrations in the liquid electrolyte.

**Table S1** Photovoltaic properties of DSSC with Ru2A containing various I<sub>2</sub> concentrations in the liquid electrolyte under 100 mWcm<sup>-2</sup> illumination.

| <b>[I<sub>2</sub>]<br/>(M)</b> | <b>PCE<br/>(%)</b> | <b>Jsc<br/>(mAcm<sup>-2</sup>)</b> | <b>Voc<br/>(V)</b> | <b>ff</b>   |
|--------------------------------|--------------------|------------------------------------|--------------------|-------------|
| <b>0</b>                       | <b>5.19</b>        | <b>10.54</b>                       | <b>0.738</b>       | <b>0.67</b> |
| <b>0.01</b>                    | <b>4.92</b>        | <b>13.62</b>                       | <b>0.703</b>       | <b>0.51</b> |
| <b>0.03</b>                    | <b>5.53</b>        | <b>15.59</b>                       | <b>0.692</b>       | <b>0.51</b> |
| <b>0.05</b>                    | <b>5.90</b>        | <b>15.20</b>                       | <b>0.680</b>       | <b>0.57</b> |
| <b>0.10</b>                    | <b>5.90</b>        | <b>14.30</b>                       | <b>0.659</b>       | <b>0.63</b> |
| <b>0.20</b>                    | <b>4.37</b>        | <b>10.30</b>                       | <b>0.639</b>       | <b>0.66</b> |
